# Supplementary material
Source: PubMed Central journal article supplement (PMC6324938)
Supplement: NIHMS1512258-supplement-1.pdf [file NIHMS1512258-supplement-1.pdf]

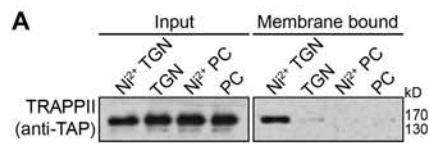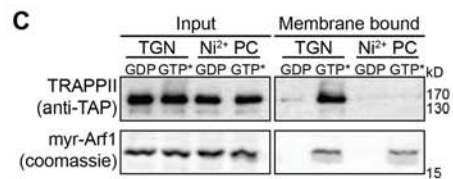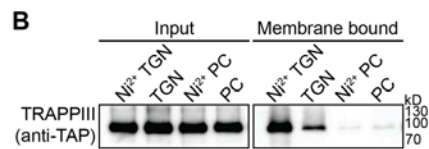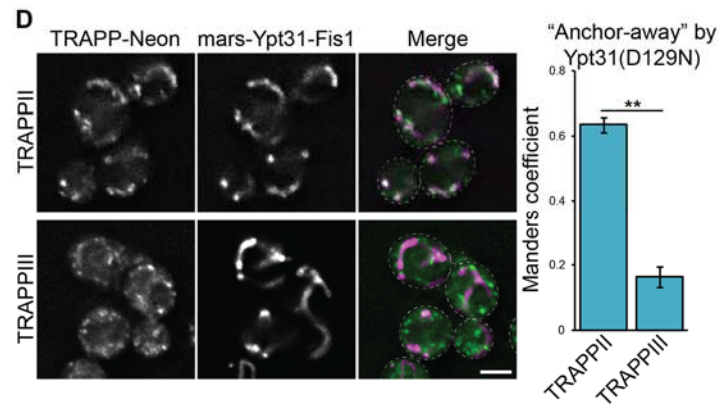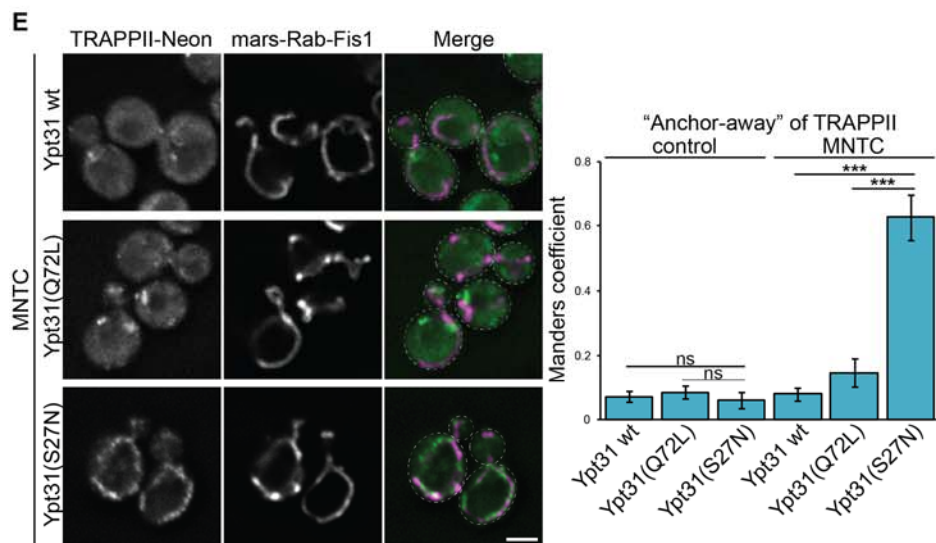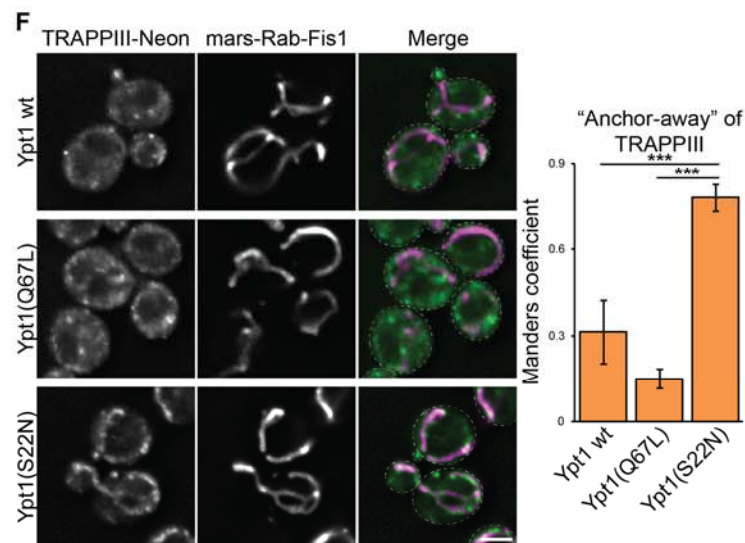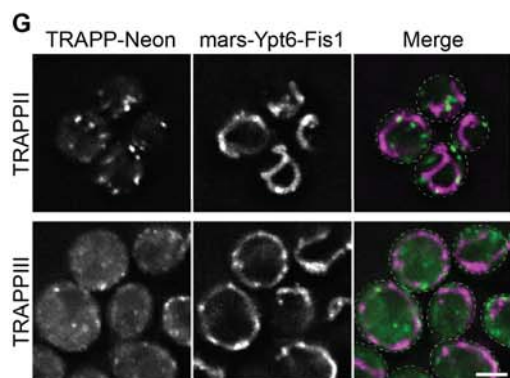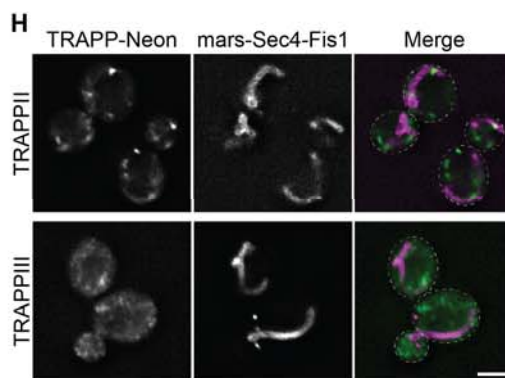

Figure S1

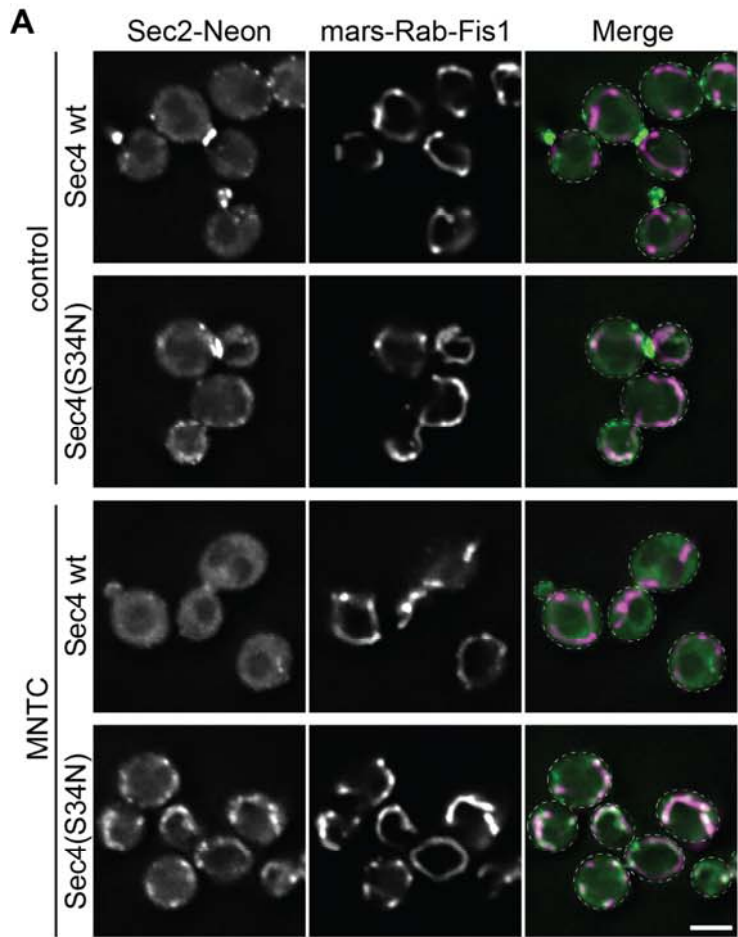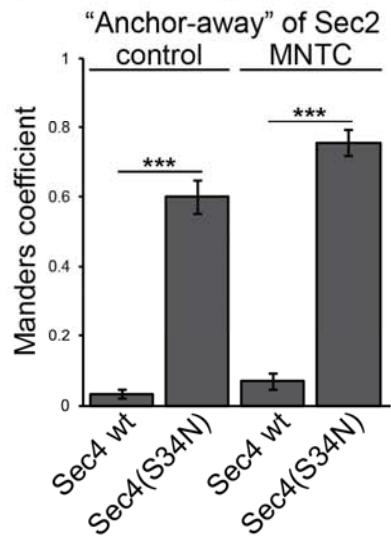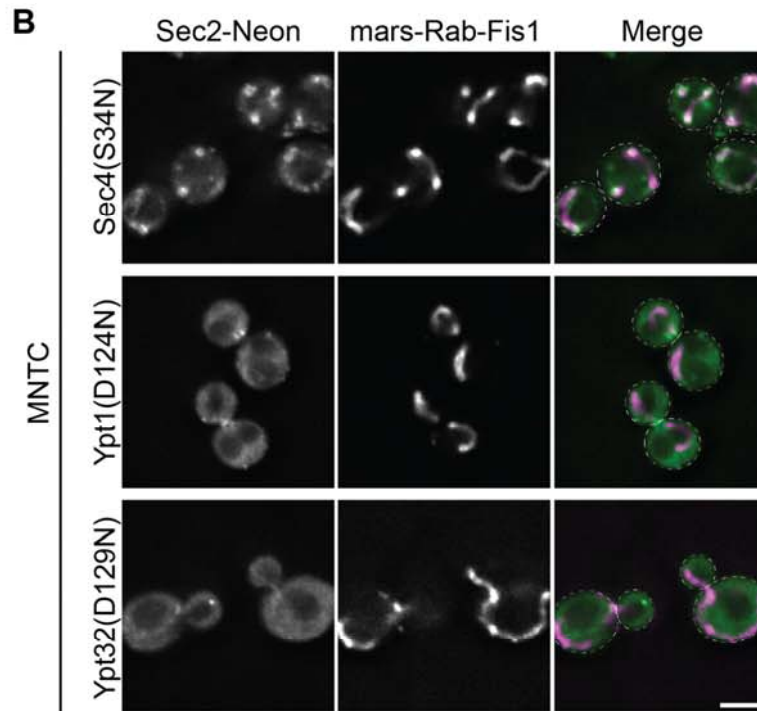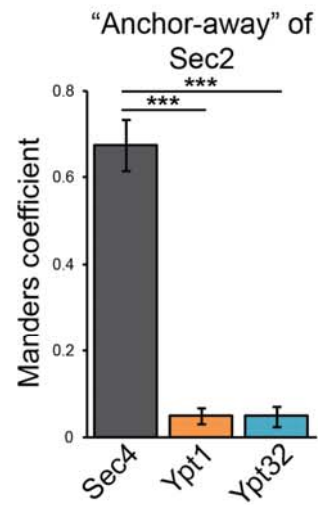

Figure S2

**A**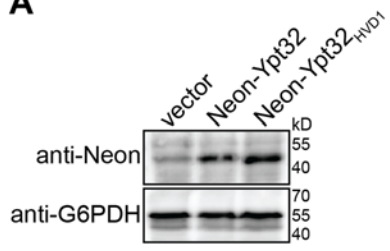**B**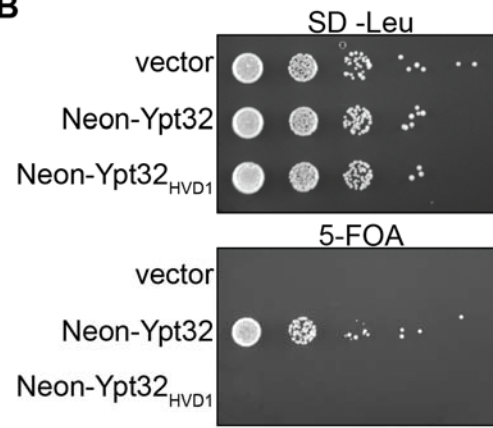

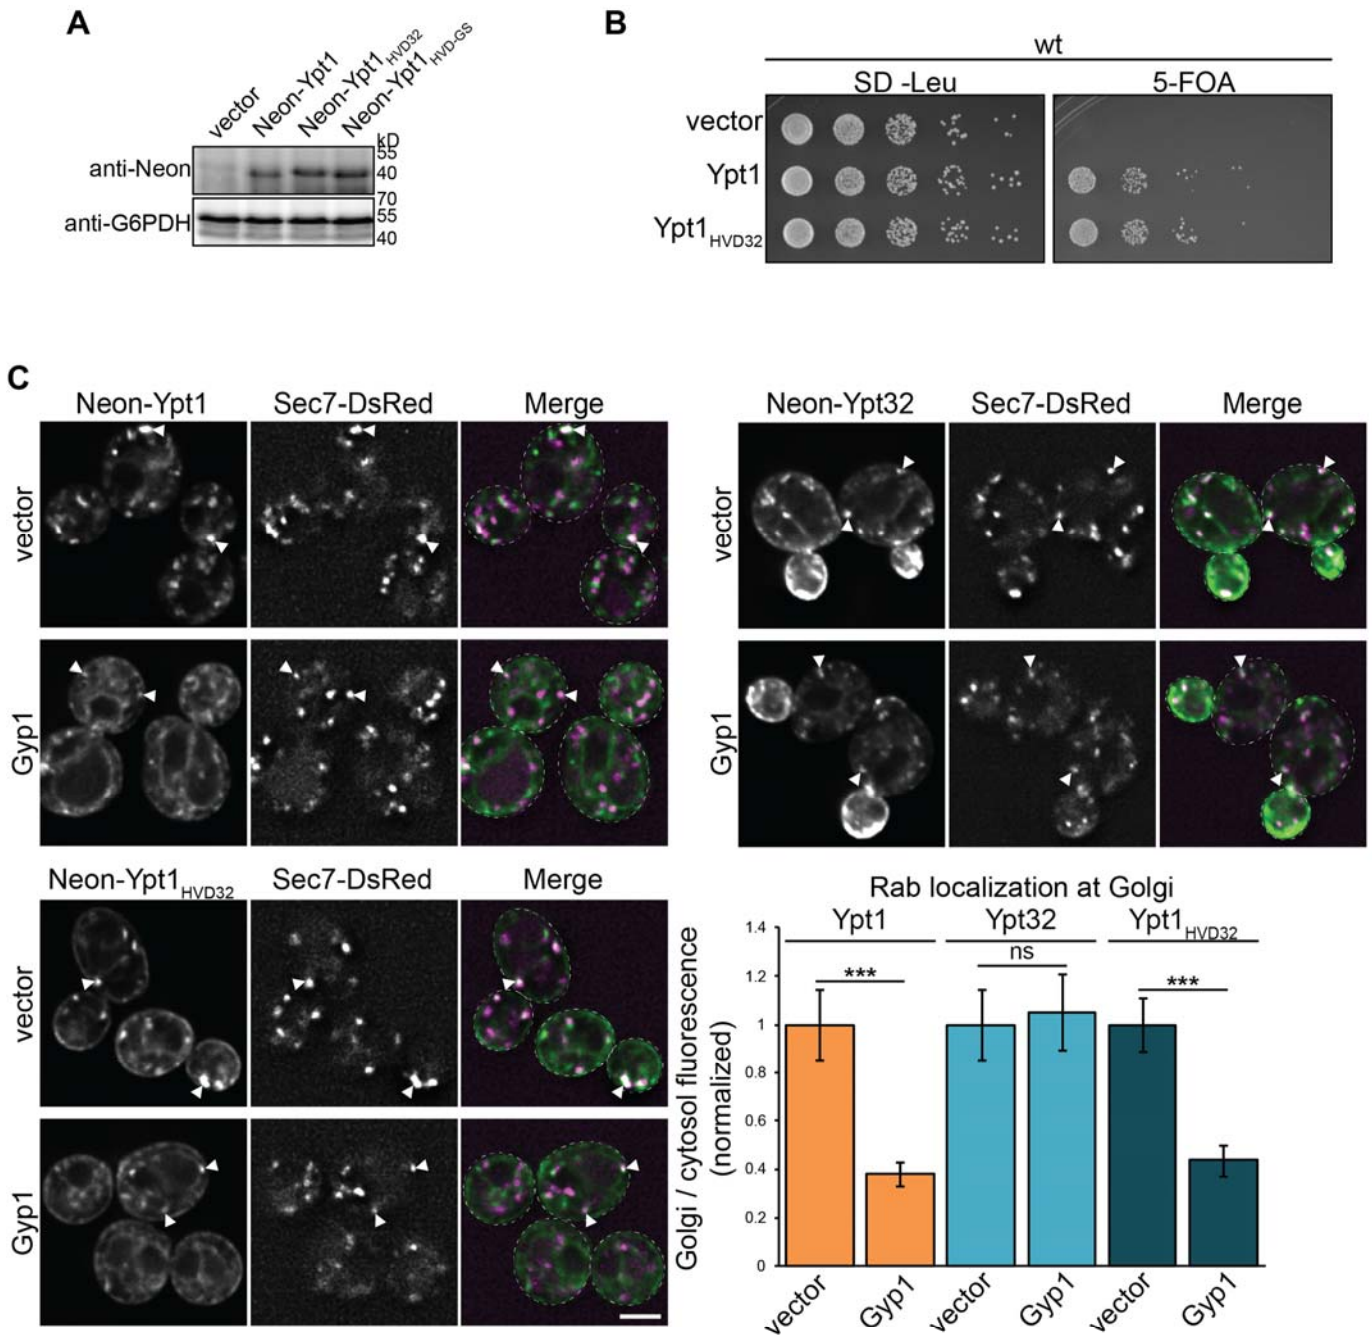

Figure S4

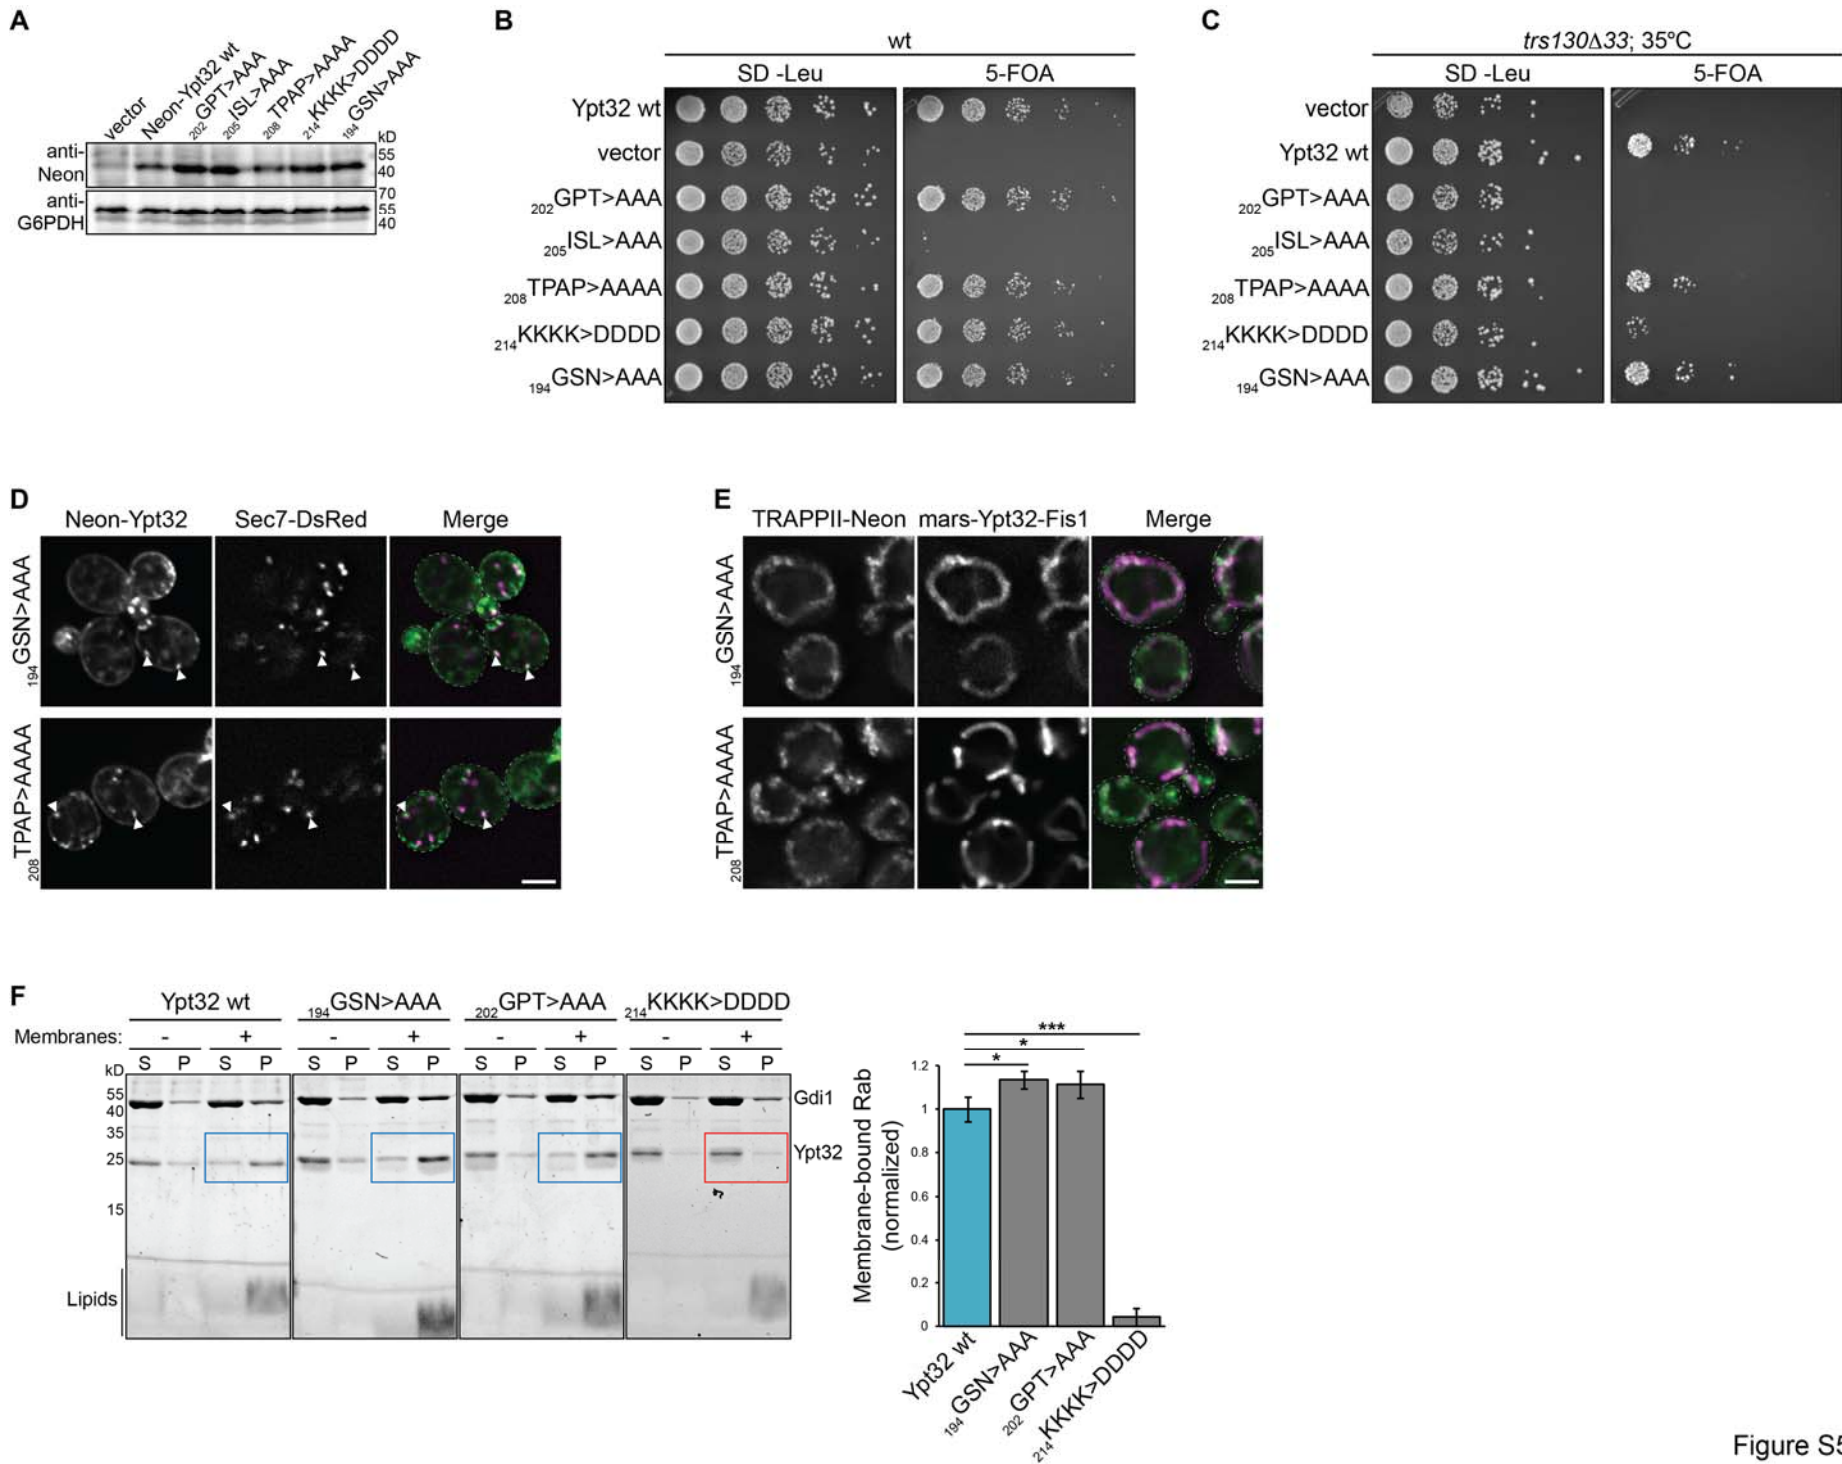

Figure S5

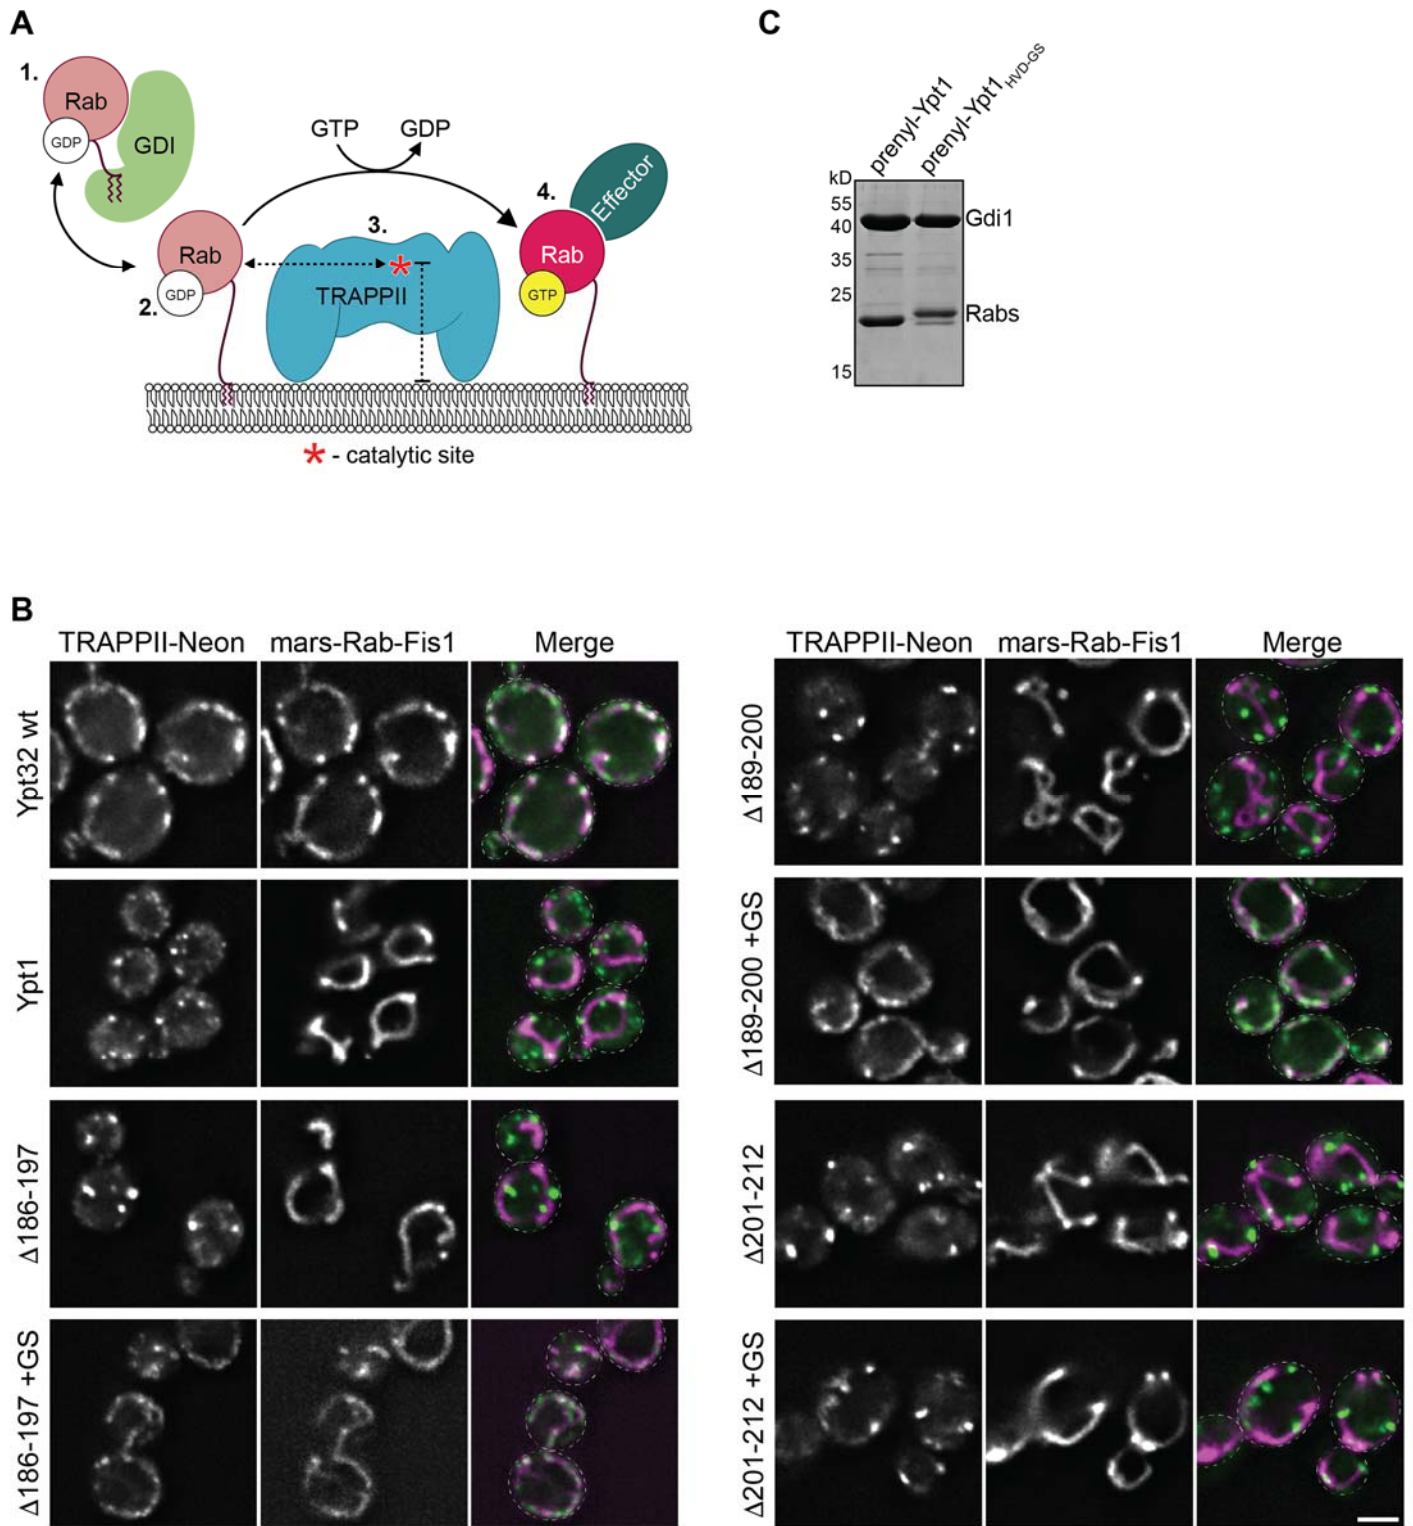

Figure S6

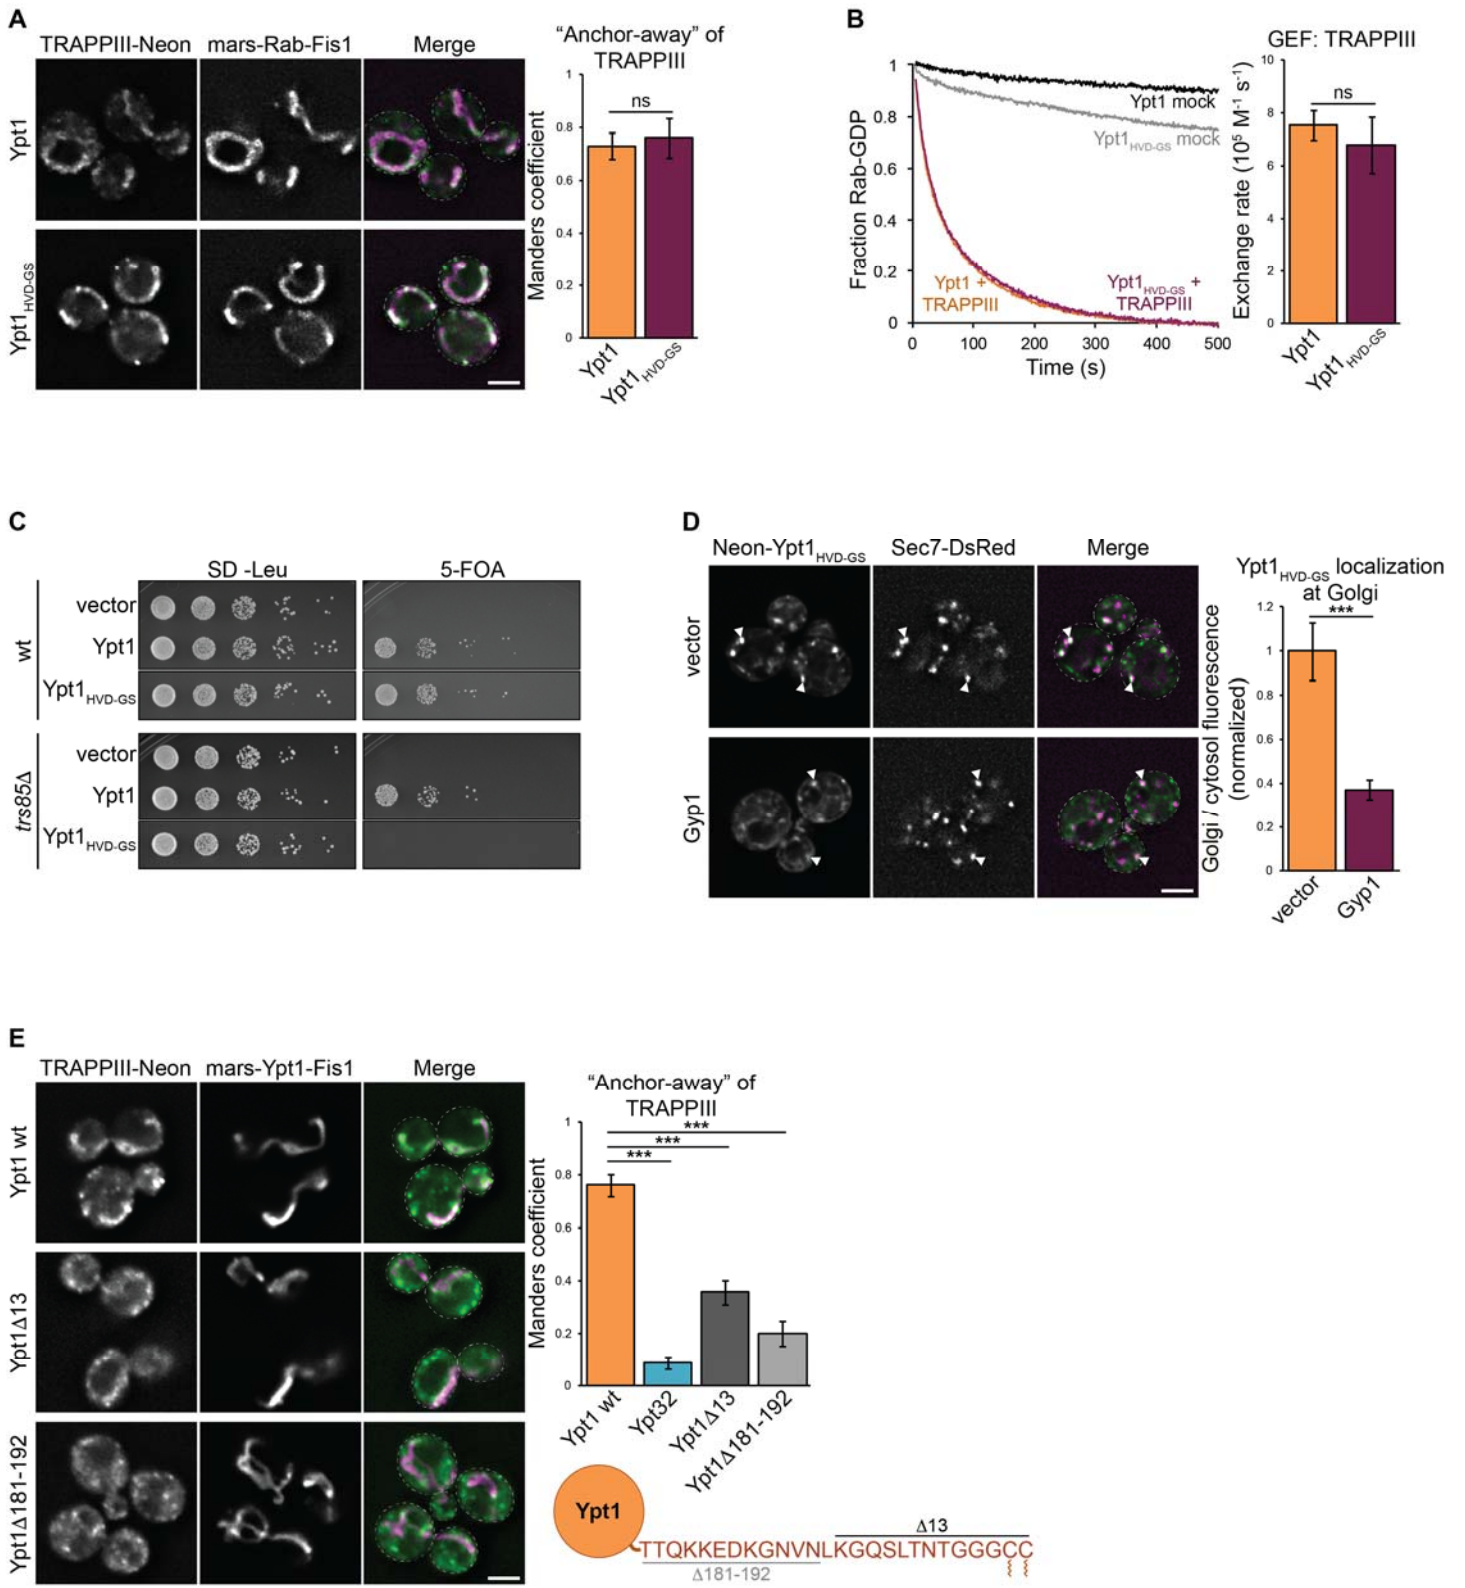

Figure S7

## Supplemental Figure Legends

**Figure S1 (related to Figure 1). Controls for GRab-IT assays used to measure TRAPP complex substrate recognition.** (A) Liposome flotation assay testing TRAPP<sup>II</sup> association with TGN or phosphatidylcholine (PC) membranes with or without 5% Ni<sup>2+</sup>-conjugated lipids. (B) Liposome flotation assay testing TRAPP<sup>III</sup> association with TGN or PC membranes with or without 5% Ni<sup>2+</sup>. (C) Liposome flotation assay testing TRAPP<sup>II</sup> recruitment to TGN (without Ni<sup>2+</sup>) or Ni<sup>2+</sup> PC membranes by activated Arf1. GTP\* indicates GMP-PNP, a non-hydrolyzable GTP analog. (D) Left: Representative images showing that nucleotide-free Ypt31(D129N) recruits TRAPP<sup>II</sup>, but not TRAPP<sup>III</sup>, to mitochondria. Right: Quantification of TRAPP complex recruitment to mitochondria. Error bars represent 95% CIs for  $n > 40$  cells. (E) Left: Representative images showing that TRAPP<sup>II</sup> is recruited to mitochondria by Ypt31(S27N) (GDP-locked), but not wild-type Ypt31 or Ypt31(Q72L) (GTP-locked). Cells were treated with the Sec7 inhibitor MNTC (20  $\mu$ M, 10 min) to facilitate TRAPP<sup>II</sup> recruitment by displacing TRAPP<sup>II</sup> from Golgi compartments. Right: Quantification of TRAPP<sup>II</sup> recruitment to mitochondria. Error bars represent 95% CIs for  $n > 40$  cells. Note that TRAPP<sup>II</sup> remains stably bound to Golgi compartments in control cells. (F) Left: Representative images showing that TRAPP<sup>III</sup> is recruited to mitochondria by Ypt1(S22N) (GDP-locked), but not wild-type Ypt1 or Ypt1(Q67L) (GTP-locked). Right: Quantification of TRAPP<sup>III</sup> recruitment to mitochondria. Error bars represent 95% CIs for  $n > 40$  cells. (G) Representative images showing that nucleotide-free Ypt6(D127N) does not recruit TRAPP<sup>II</sup> or TRAPP<sup>III</sup> to mitochondria. See Figure 1 for quantification. (H) Representative images showing that nucleotide-free Sec4(D136N) does not recruit TRAPP<sup>II</sup> or TRAPP<sup>III</sup> to mitochondria. See Figure 1 for quantification. Scale bars, 2  $\mu$ m.

**Figure S2 (related to Figure 1). The GRab-IT assay can be extended to characterize other Rab-GEF pairs.** (A) Top: Representative images showing that Sec2 is recruited to mitochondria by Sec4(S34N) (GDP-locked), but not wild-type Sec4. Cells were treated with MNTC (20  $\mu$ M, 10 min) to facilitate GEF recruitment by displacing Sec2 from secretory vesicles. Bottom: Quantification of Sec2 recruitment to mitochondria. Error bars represent 95% CIs for  $n > 40$  cells. (B) Top: Representative



images showing that Sec2 is recruited to mitochondria by Sec4(S34N), but not Ypt1(D124N) or Ypt32 (D129N), in MNTC-treated cells. Bottom: Quantification of Sec2 recruitment to mitochondria. Error bars represent 95% CIs for  $n > 40$  cells. Scale bars, 2  $\mu\text{m}$ .

**Figure S3 (related to Figure 4). Controls for microscopy and complementation tests with Ypt31/32 constructs.** (A) Western blot showing expression of Ypt32 constructs used in complementation tests and microscopy. G6PDH serves as a loading control. (B) mNG-tagged wild-type Ypt32 complements a *ypt31 $\Delta$ ypt32 $\Delta$*  mutant in a wild-type background.

**Figure S4 (related to Figure 5): The HVD does not mediate substrate specificity for the Ypt1 GAP Gyp1.** (A) Western blot showing expression of Ypt1 constructs used in complementation tests and microscopy. G6PDH serves as a loading control. (B) Ypt1<sub>HVD32</sub> was tested for its ability to complement a *ypt1 $\Delta$*  mutant in a wild-type background. (C) Top: Localization of mNG-tagged Ypt1 (left) and Ypt32 (right) relative to Sec7-DsRed with or without overexpression of the Ypt1 GAP Gyp1. Bottom left: Localization of mNG-tagged Ypt1<sub>HVD32</sub> relative to Sec7 with or without Gyp1 overexpression. Bottom right: Quantification of Golgi (active) versus cytosolic/ER-localized (inactive) Rab under each condition. Error bars represent 95% CIs for  $n \geq 25$  compartments. Scale bar, 2  $\mu\text{m}$ . White arrowheads denote colocalization of Rabs and Sec7 at late Golgi compartments.

**Figure S5 (related to Figure 6). Controls for assays with Ypt32 HVD point mutants.** (A) Western blot showing expression of Ypt32 HVD point mutants used in complementation tests and microscopy. G6PDH serves as a loading control. (B) The indicated Ypt32 HVD mutants were tested for their ability to complement a *ypt31 $\Delta$ ypt32 $\Delta$*  mutant in a wild-type background. (C) The indicated Ypt32 HVD mutants were tested for their ability to complement a *ypt31 $\Delta$ ypt32 $\Delta$*  mutant in the sensitized *trs130 $\Delta$ 33* (TRAPP II mutant) background. Cells were grown at 35°C. (D) Representative images of mNG-tagged Ypt32 HVD point mutants relative to Sec7-DsRed. See Figure

6C for quantification. (E) Representative images showing recruitment of TRAPP<sup>II</sup> to mitochondria by the indicated nucleotide-free Ypt32 HVD mutants. See Figure 6D for quantification. (F) Left: Representative liposome pelleting assays with wild-type Ypt32 versus HVD mutant substrates. Prenylated Ypt32/GDI complexes were assayed for membrane binding following EDTA-based exchange with GTP. Efficiently prenylated Rabs bound membranes in a nucleotide-dependent manner (blue boxes), but Ypt32<sup>214</sup>KKKK>DDDD did not associate with membranes (red box). Failure of Ypt32<sup>214</sup>KKKK>DDDD to bind membranes could be due to a lack of prenylation, or that the charge reversal prevents the mutant from associating with anionic membranes. Right: Quantification of membrane binding for each construct tested. Values are normalized so that wild-type Ypt32 membrane-binding is equal to 1.0. Error bars represent 95% CIs for  $n \geq 4$  pelleting reactions. Scale bars, 2  $\mu\text{m}$ . White arrowheads denote colocalization of Rabs and Sec7 at late Golgi compartments.

**Figure S6 (related to Figure 7). Truncating the Ypt32 HVD abolishes substrate recognition by TRAPP<sup>II</sup>.** (A) Schematic depicting the importance of HVD length during Rab activation. Inactive Rabs are bound by GDI (1) and delivered to membranes where they anchor via their prenylated C-terminus (2). The HVD must be long enough to access the GEF active site to permit nucleotide exchange (3). Activated Rabs bind effectors to coordinate membrane trafficking (4). (B) Representative images showing TRAPP<sup>II</sup> recruitment to mitochondria by nucleotide-free Ypt32 versus the indicated HVD truncation and Gly-Ser rescue constructs. See Figure 7A for quantification. (C) Coomassie-stained SDS-PAGE gel showing prenylated Rab substrates used to test whether Ypt1 HVD length affects TRAPP-mediated nucleotide exchange. Scale bar, 2  $\mu\text{m}$ .

**Figure S7 (related to Figure 7). Truncating the Ypt1 HVD impairs substrate recognition by TRAPP<sup>III</sup>.** (A) Left: Representative images showing TRAPP<sup>III</sup> recruitment to mitochondria by nucleotide-free Ypt1 versus the longer HVD Ypt1<sup>HVD-GS</sup>. Right: Quantification of TRAPP<sup>III</sup> recruitment to mitochondria. Error bars represent 95% CIs for  $n > 40$  cells. (B) Left: Representative traces showing activation of Ypt1 versus

Ypt1<sub>HVD-GS</sub> by TRAPPIII in the presence of TGN membranes. mock = buffer only control reaction. Right: Rates of TRAPPIII-mediated nucleotide exchange calculated from the traces at left. Error bars represent 95% CIs for  $n \geq 3$  reactions. (C) The longer HVD Ypt1<sub>HVD-GS</sub> was tested for its ability to complement a *ypt1* $\Delta$  mutant in either a wild-type or *trs85* $\Delta$  (TRAPPIII mutant) background. (D) Left: Localization of mNG-tagged Ypt1<sub>HVD-GS</sub> relative to Sec7-DsRed with or without overexpression of the Ypt1 GAP Gyp1. Right: Quantification of Golgi (active) versus cytosolic/ER-localized (inactive) Ypt1<sub>HVD-GS</sub> with or without Gyp1 overexpression. Error bars represent 95% CIs for  $n \geq 25$  compartments. (E) Left: Representative images showing TRAPPIII recruitment to mitochondria by nucleotide-free Ypt1(D124N) with a full-length HVD versus the indicated truncation mutants. Right: Quantification of TRAPPIII recruitment to mitochondria. Error bars represent 95% CIs for  $n > 40$  cells. Scale bars, 2  $\mu$ m. White arrowheads denote colocalization of Rabs and Sec7 at late Golgi compartments.

#

## Supplemental Tables

**Table S1 (related to STAR Methods, Liposome Preparation).** Composition of liposomes used in this study.

| <b>Lipid</b>                | <b>TGN</b> | <b>Ni<sup>2+</sup><br/>TGN</b> | <b>PC</b> | <b>Ni<sup>2+</sup><br/>PC</b> |
|-----------------------------|------------|--------------------------------|-----------|-------------------------------|
| <b>DOPC</b>                 | 24%        | 24%                            | 99%       | 94%                           |
| <b>POPC</b>                 | 6%         | 6%                             |           |                               |
| <b>DOPE</b>                 | 7%         | 7%                             |           |                               |
| <b>POPE</b>                 | 3%         | 3%                             |           |                               |
| <b>DOPS</b>                 | 1%         | 1%                             |           |                               |
| <b>POPS</b>                 | 2%         | 2%                             |           |                               |
| <b>DOPA</b>                 | 1%         | 1%                             |           |                               |
| <b>POPA</b>                 | 2%         | 2%                             |           |                               |
| <b>PI</b>                   | 29%        | 24%                            |           |                               |
| <b>PI(4)P</b>               | 1%         | 1%                             |           |                               |
| <b>CDP-DAG</b>              | 2%         | 2%                             |           |                               |
| <b>DO-DAG</b>               | 2%         | 2%                             |           |                               |
| <b>PO-DAG</b>               | 4%         | 4%                             |           |                               |
| <b>Ceramide (C18)</b>       | 5%         | 5%                             |           |                               |
| <b>Cholesterol</b>          | 10%        | 10%                            |           |                               |
| <b>Ni<sup>2+</sup>-DOGS</b> |            | 5%                             |           | 5%                            |
| <b>DiR dye</b>              | 1%         | 1%                             | 1%        | 1%                            |

**Table S2 (related to Figure 2).** Sequences of Rab chimeras used in this study.

| <b>Rab chimera</b>           | <b>NBD residues</b> | <b>HVD residues (not including C-terminal cysteines)</b> |
|------------------------------|---------------------|----------------------------------------------------------|
| Ypt1 <sub>HVD31</sub>        | Ypt1(1-180)         | Ypt31(186-221)                                           |
| Ypt1 <sub>HVD32</sub>        | Ypt1(1-180)         | Ypt32(186-220)                                           |
| Ypt1 +30                     | Ypt1(1-180)         | Ypt1(181-204) + SGGGSGGSGSGGSGG<br>SGGGSGGSGSGGSGG       |
| Ypt1 +15                     | Ypt1(1-180)         | Ypt1(181-204) + SGGGSGGSGSGGSGG                          |
| Ypt1 <sub>HVD-GS (+12)</sub> | Ypt1(1-180)         | Ypt1(181-204) + SGGGSGGSGSGG                             |
| Ypt1 +9                      | Ypt1(1-180)         | Ypt1(181-204) + SGGGSGGSG                                |
| Ypt1 +6                      | Ypt1(1-180)         | Ypt1(181-204) + SGGGSG                                   |
| Ypt1 +3                      | Ypt1(1-180)         | Ypt1(181-204) + SGG                                      |
| Ypt31 <sub>HVD1</sub>        | Ypt31(1-185)        | Ypt1(181-204)                                            |
| Ypt32 <sub>HVD1</sub>        | Ypt32(1-185)        | Ypt1(181-204)                                            |
| Ypt6 <sub>HVD31</sub>        | Ypt6(1-185)         | Ypt31(186-221)                                           |
| Ypt6 <sub>HVD1</sub>         | Ypt6(1-185)         | Ypt1(181-204)                                            |

**Table S3 (related to Figure 1).** Summary of results from GRab-IT experiments, GEF reconstitution assays, complementation tests, and microscopy of mNG-Rabs. We note that Ypt31 and Ypt32 are genetically redundant paralogs and very similar results were obtained whenever direct comparisons were made between these paralogs.

| Rab construct                  | TRAPP <sup>II</sup> recruitment (GRab-IT; Average MOC) | TRAPP <sup>III</sup> recruitment (GRab-IT; Average MOC) | TRAPP <sup>II</sup> -mediated activation (GEF reconstitution; Exchange rate) | TRAPP <sup>III</sup> -mediated activation (GEF reconstitution; Exchange rate) | Complementation tests (plasmid shuffling; cell growth) | Activated <i>in vivo</i> (live cell imaging; Average Golgi/cytosol fluorescence) | Overlap with Sec7 (live cell imaging; Average MOC) |
|--------------------------------|--------------------------------------------------------|---------------------------------------------------------|------------------------------------------------------------------------------|-------------------------------------------------------------------------------|--------------------------------------------------------|----------------------------------------------------------------------------------|----------------------------------------------------|
| Ypt1                           | 0.09 ± 0.02                                            | 0.73 ± 0.05                                             | n.d.                                                                         | 5.39x10 <sup>5</sup> ± 0.43x10 <sup>5</sup>                                   | +++*                                                   |                                                                                  | 0.39 ± 0.03                                        |
| Ypt1 <sub>HVD31/32</sub>       | 0.60 ± 0.03                                            | 0.75 ± 0.05                                             | 4.42x10 <sup>5</sup> ± 0.20x10 <sup>5</sup>                                  | 2.76x10 <sup>5</sup> ± 0.38x10 <sup>5</sup>                                   | +/-*                                                   |                                                                                  | 0.49 ± 0.05                                        |
| Ypt1 <sub>HVD-GS</sub>         | 0.50 ± 0.04                                            | 0.76 ± 0.07                                             | 7.59x10 <sup>5</sup> ± 0.74x10 <sup>5</sup>                                  | 6.82x10 <sup>5</sup> ± 1.07x10 <sup>5</sup>                                   | -*                                                     |                                                                                  | 0.53 ± 0.05                                        |
| Ypt31/32                       | 0.71 ± 0.05                                            | 0.06 ± 0.02                                             | 11.82x10 <sup>5</sup> ± 0.51x10 <sup>5</sup>                                 | n.d.                                                                          | ++++                                                   | 7.94 ± 1.23                                                                      |                                                    |
| Ypt31/32 <sub>HVD1</sub>       | 0.07 ± 0.03                                            | 0.54 ± 0.06                                             | n.d.                                                                         | n.d.                                                                          | -                                                      | 2.42 ± 0.18                                                                      |                                                    |
| Ypt6                           | 0.06 ± 0.01                                            | 0.05 ± 0.02                                             |                                                                              |                                                                               |                                                        |                                                                                  |                                                    |
| Ypt6 <sub>HVD1</sub>           |                                                        | 0.07 ± 0.02                                             |                                                                              |                                                                               |                                                        |                                                                                  |                                                    |
| Ypt6 <sub>HVD31</sub>          | 0.05 ± 0.04                                            |                                                         |                                                                              |                                                                               |                                                        |                                                                                  |                                                    |
| Sec4                           | 0.11 ± 0.04                                            | 0.06 ± 0.04                                             |                                                                              |                                                                               |                                                        |                                                                                  |                                                    |
| Ypt1 wt                        | 0.09 ± 0.02                                            |                                                         |                                                                              |                                                                               |                                                        |                                                                                  |                                                    |
| Ypt1 +3                        | 0.10 ± 0.02                                            |                                                         |                                                                              |                                                                               |                                                        |                                                                                  |                                                    |
| Ypt1 +6                        | 0.16 ± 0.05                                            |                                                         |                                                                              |                                                                               |                                                        |                                                                                  |                                                    |
| Ypt1 +9                        | 0.41 ± 0.11                                            |                                                         |                                                                              |                                                                               |                                                        |                                                                                  |                                                    |
| Ypt1 <sub>HVD-GS</sub> (+12)   | 0.55 ± 0.10                                            |                                                         |                                                                              |                                                                               |                                                        |                                                                                  |                                                    |
| Ypt1 +15                       | 0.67 ± 0.08                                            |                                                         |                                                                              |                                                                               |                                                        |                                                                                  |                                                    |
| Ypt1 +30                       | 0.65 ± 0.08                                            |                                                         |                                                                              |                                                                               |                                                        |                                                                                  |                                                    |
| Ypt1 wt                        |                                                        | 0.76 ± 0.04                                             |                                                                              |                                                                               |                                                        |                                                                                  |                                                    |
| Ypt1 $\Delta$ 13               |                                                        | 0.36 ± 0.05                                             |                                                                              |                                                                               |                                                        |                                                                                  |                                                    |
| Ypt1 $\Delta$ 181-192          |                                                        | 0.20 ± 0.05                                             |                                                                              |                                                                               |                                                        |                                                                                  |                                                    |
| Ypt32 wt                       | 0.66 ± 0.05                                            |                                                         | 12.59x10 <sup>5</sup> ± 2.63x10 <sup>5</sup>                                 |                                                                               | ++++**                                                 | 11.63 ± 1.61                                                                     |                                                    |
| Ypt32 <sub>194</sub> GSN>AAA   | 0.68 ± 0.04                                            |                                                         | 13.67x10 <sup>5</sup> ± 2.32x10 <sup>5</sup>                                 |                                                                               | ++++**                                                 | 11.33 ± 1.49                                                                     |                                                    |
| Ypt32 <sub>202</sub> GPT>AAA   | 0.54 ± 0.04                                            |                                                         | 5.92x10 <sup>5</sup> ± 0.16x10 <sup>5</sup>                                  |                                                                               | +**                                                    | 4.73 ± 1.07                                                                      |                                                    |
| Ypt32 <sub>205</sub> ISL>AAA   | 0.18 ± 0.04                                            |                                                         |                                                                              |                                                                               | -**                                                    | n/a                                                                              |                                                    |
| Ypt32 <sub>206</sub> TPAP>AAAA | 0.64 ± 0.03                                            |                                                         |                                                                              |                                                                               | ++++**                                                 | 11.88 ± 1.51                                                                     |                                                    |
| Ypt32 <sub>214</sub> KKKK>DDDD | 0.37 ± 0.04                                            |                                                         |                                                                              |                                                                               | +++*                                                   | 6.62 ± 0.96                                                                      |                                                    |
| Ypt32 wt                       | 0.75 ± 0.03                                            |                                                         |                                                                              |                                                                               |                                                        |                                                                                  |                                                    |
| Ypt32 $\Delta$ 186-189         | 0.08 ± 0.02                                            |                                                         |                                                                              |                                                                               |                                                        |                                                                                  |                                                    |
| Ypt32 $\Delta$ 186-189 +GS     | 0.73 ± 0.05                                            |                                                         |                                                                              |                                                                               |                                                        |                                                                                  |                                                    |
| Ypt32 $\Delta$ 189-200         | 0.08 ± 0.02                                            |                                                         |                                                                              |                                                                               |                                                        |                                                                                  |                                                    |
| Ypt32 $\Delta$ 189-200 +GS     | 0.07 ± 0.05                                            |                                                         |                                                                              |                                                                               |                                                        |                                                                                  |                                                    |
| Ypt32 $\Delta$ 201-212         | 0.06 ± 0.02                                            |                                                         |                                                                              |                                                                               |                                                        |                                                                                  |                                                    |
| Ypt32 $\Delta$ 201-212 +GS     | 0.06 ± 0.02                                            |                                                         |                                                                              |                                                                               |                                                        |                                                                                  |                                                    |

\**trs85* $\Delta$  TRAPP<sup>III</sup> mutant shuffling background

\*\**trs130* $\Delta$ 33 TRAPP<sup>II</sup> mutant shuffling background#
